# Supplementary material for: Clinical significance and immune landscape of angiogenesis-related genes in bladder cancer
Source: publisher site journal article supplement (doi:10.18632/aging.205222), 2023-11-20
Supplement: Supplementary file [file aging-v15i22-205222-supplementary-material-SD2.pdf]

## SUPPLEMENTARY TABLE

**Supplementary Table 1. The primer sequences for qRT-PCR.**

| <b>Gene</b> | <b>Primer sequence (5'-3')</b> |
|-------------|--------------------------------|
| H-COL5A2-F  | CGCTTATGGAGACCACCAAT           |
| H-COL5A2-R  | TCATTTGCCCTTTGAGAAC            |
| H-JAG1- F   | GACTCATCAGCCGTGTCTCA           |
| H-JAG1-R    | TGGGGAACACTCACACTCAA           |
| H-MSX1- F   | AAGTTCCGCCAGAAGCAGT            |
| H-MSX1-R    | GCCATCTTCAGCTTCTCCAG           |
| H-OLR1- F   | CCCAGGTGTCTGACCTCCTA           |
| H-OLR1-R    | CCGAGCAAGGGTTTCTATCA           |
| H-STC- F    | TCAGCTGAAGTGGTTCGTTG           |
| H-STC-R     | GACGAATGCTTTTCCCTGAG           |
